# Supplementary material for: Differential Effects of Surface-Functionalized Zirconium Oxide Nanoparticles on Alveolar Macrophages, Rat Lung, and a Mouse Allergy Model
Source: Nanomaterials (Basel). 2017 Sep 19;7(9):280. doi: 10.3390/nano7090280 (PMC5618391; doi:10.3390/nano7090280)
Supplement: Supplementary file 1 [file nanomaterials-07-00280-s001.pdf]

# Supplementary Information

## Differential Effects of Surface-Functionalized Zirconium Oxide Nanoparticles on Alveolar Macrophages, Rat Lung, and a Mouse Allergy Model

Antje Vennemann <sup>1</sup>, Francesca Alessandrini <sup>2</sup> and Martin Wiemann <sup>1,\*</sup>

<sup>1</sup> IBE R&D Institute for Lung Health gGmbH, Mendelstr. 11, 48149 Münster, Germany; vennemann@ibe-ms.de

<sup>2</sup> Center of Allergy and Environment (ZAUM), Technical University of Munich and Helmholtz Center Munich, Member of the German Center for Lung Research (DZL), Ingolstädter Landstr. 1, 85764 Neuherberg, Germany; franci@helmholtz-muenchen.de

\* Correspondence: martin.wiemann@ibe-ms.de; Tel.: +49-251-9802340

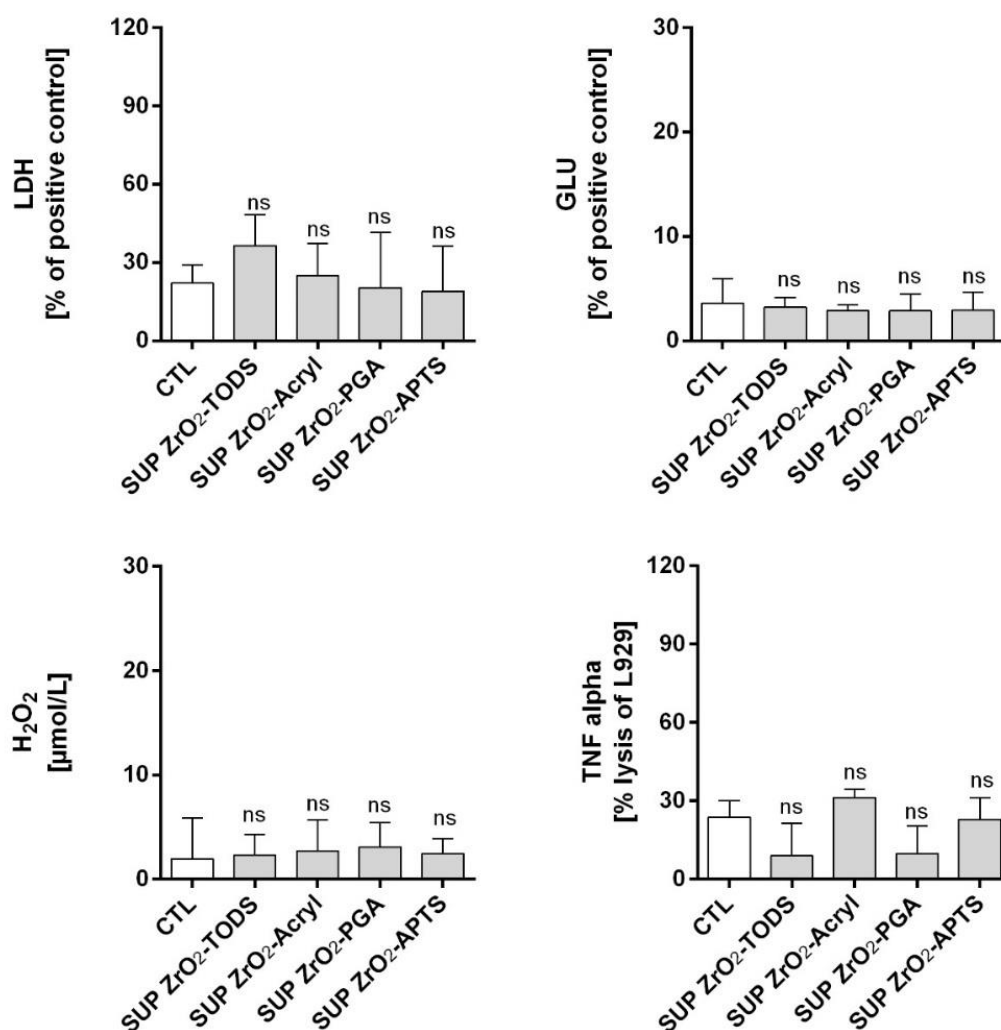

**Figure S1.** In vitro effects of supernatants generated from particle ZrO<sub>2</sub> NPs preparations. Particle stock suspensions of ZrO<sub>2</sub>-TODS, ZrO<sub>2</sub>-Acryl, ZrO<sub>2</sub>-PGA, and ZrO<sub>2</sub>-APTS were subjected to centrifugation (28,000 g, 8 h) to obtain particle-free supernatants (SUP). Volumes equivalent to the 180 μg/mL concentration (c.f. Figure 4) were then diluted in F-12K medium or KRPG buffer and applied to NR8383 macrophages. (ns) not significant, (CTL) untreated control cells.

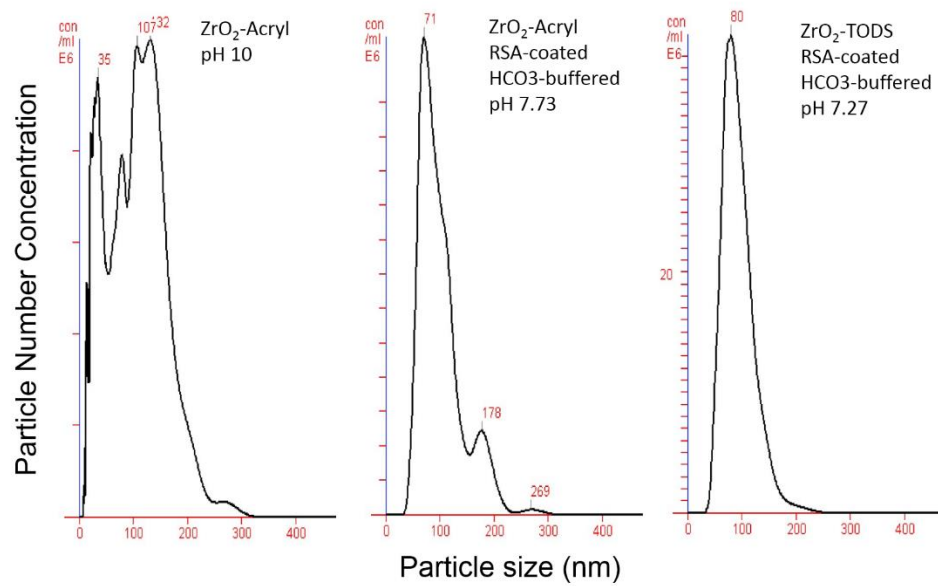

**Figure S2.** Size distribution of rat serum albumin-coated ZrO<sub>2</sub> particles as prepared for intratracheal administration in rats. Particles were buffered with 25 mM HCO<sub>3</sub><sup>-</sup> and 5% CO<sub>2</sub>. Measurements were carried out with optical particle tracking and NanoSight Software NTA 2.2 (Minton Park Amesbury, Wiltshire SP4 7RT, UK).

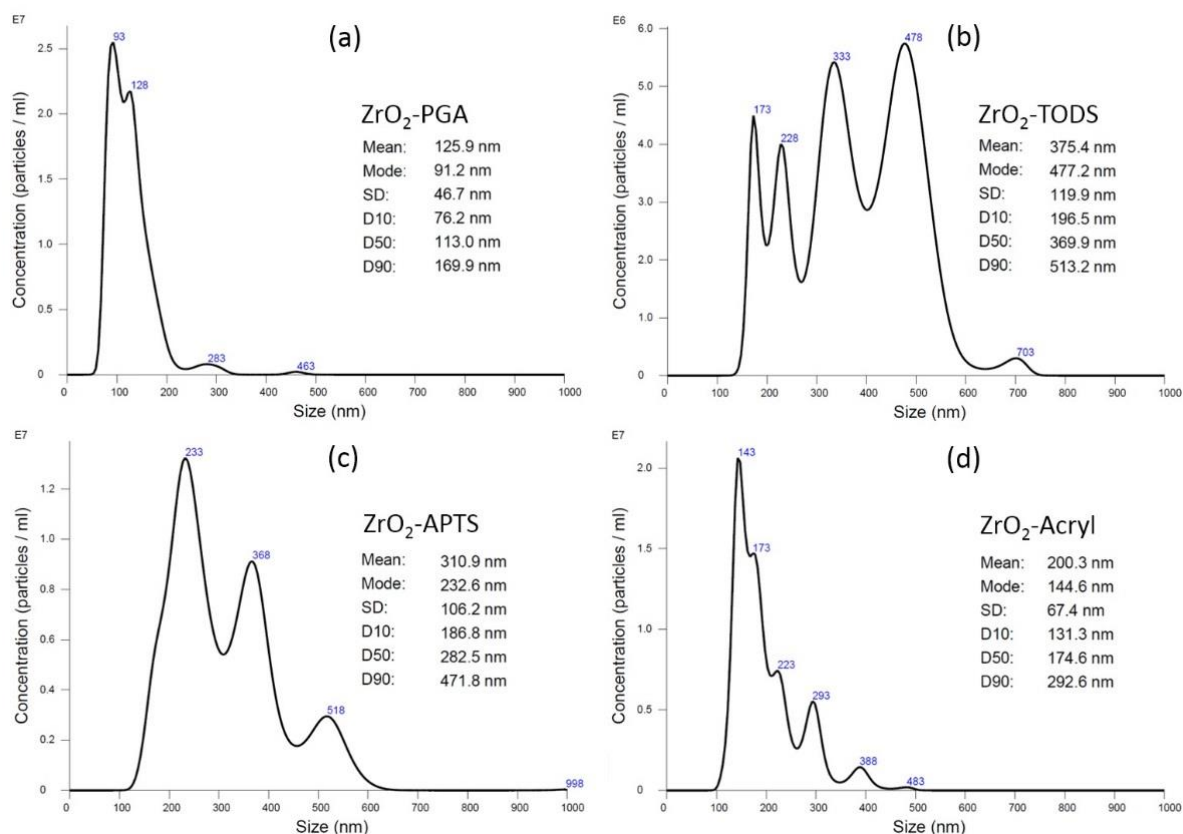

**Figure S3.** Size distribution of ZrO<sub>2</sub> nanoparticles dispersed in 0.9% NaCl/PBS as used for an administration study in ovalbumin-sensitized mice. (a) ZrO<sub>2</sub>-PGA, (b) ZrO<sub>2</sub>-TODS, (c) ZrO<sub>2</sub>-APTS, and (d) ZrO<sub>2</sub>-Acryl. Measurements were carried out with optical particle tracking and NanoSight Software NTA 3.1 (Minton Park Amesbury, Wiltshire SP4 7RT, UK).

**Table S1.** Characteristics of zirconia nanoparticles as published by the NanoGEM consortium. Data are taken from references [23,24] cited in the main text.

|                        | ZrO <sub>2</sub> -Acryl                                                           | ZrO <sub>2</sub> -PGA                                                                         | ZrO <sub>2</sub> -APTS                                                                                                                  | ZrO <sub>2</sub> -TODS                                                                                                                                     |
|------------------------|-----------------------------------------------------------------------------------|-----------------------------------------------------------------------------------------------|-----------------------------------------------------------------------------------------------------------------------------------------|------------------------------------------------------------------------------------------------------------------------------------------------------------|
| Organic residue        | polyacrylic acid                                                                  | polyethylene glycol<br>(600 g/mol)                                                            | aminopropyltrimethoxy<br>silane                                                                                                         | trioxadecanoic acid                                                                                                                                        |
| Particle size TEM [nm] | 9                                                                                 | 9                                                                                             | 10                                                                                                                                      | 9                                                                                                                                                          |
| BET surface            | 117                                                                               | 117                                                                                           | 105                                                                                                                                     | 117                                                                                                                                                        |
| Zeta potential (mV)    | -29.2                                                                             | -25.2                                                                                         | -20.5                                                                                                                                   | -25.1                                                                                                                                                      |
| Structure              | 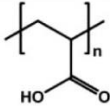 | 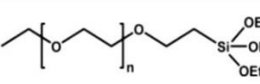             | 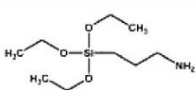                                                      | 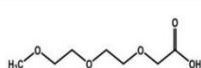                                                                        |
| Formula                | -                                                                                 | HOOC-CH <sub>2</sub> -(OC <sub>2</sub> H <sub>4</sub> ) <sub>n</sub> -O-CH <sub>2</sub> -COOH | H <sub>2</sub> N-C <sub>3</sub> H <sub>6</sub> -Si(OCH <sub>3</sub> ) <sub>3</sub><br>SiC <sub>6</sub> H <sub>15</sub> O <sub>3</sub> N | HOOC-CH <sub>2</sub> -O-C <sub>2</sub> H <sub>4</sub> -O-C <sub>2</sub> H <sub>2</sub> -O-CH <sub>3</sub><br>C <sub>7</sub> O <sub>5</sub> H <sub>14</sub> |
